# Supplementary material for: Metabolomic Assessment Reveals Alteration in Polyols and Branched Chain Amino Acids Associated With Present and Future Renal Impairment in a Discovery Cohort of 637 Persons With Type 1 Diabetes
Source: PubMed Central journal article supplement (PMC6883958; doi:10.3389/fendo.2019.00818), 2019-11-22
Supplement: Image_1.pdf [file Image_1.pdf]

Supplementary Figure S1 – Incidence of the combined renal endpoint and specific endpoints in persons with normo-, micro- and macroalbuminuria.

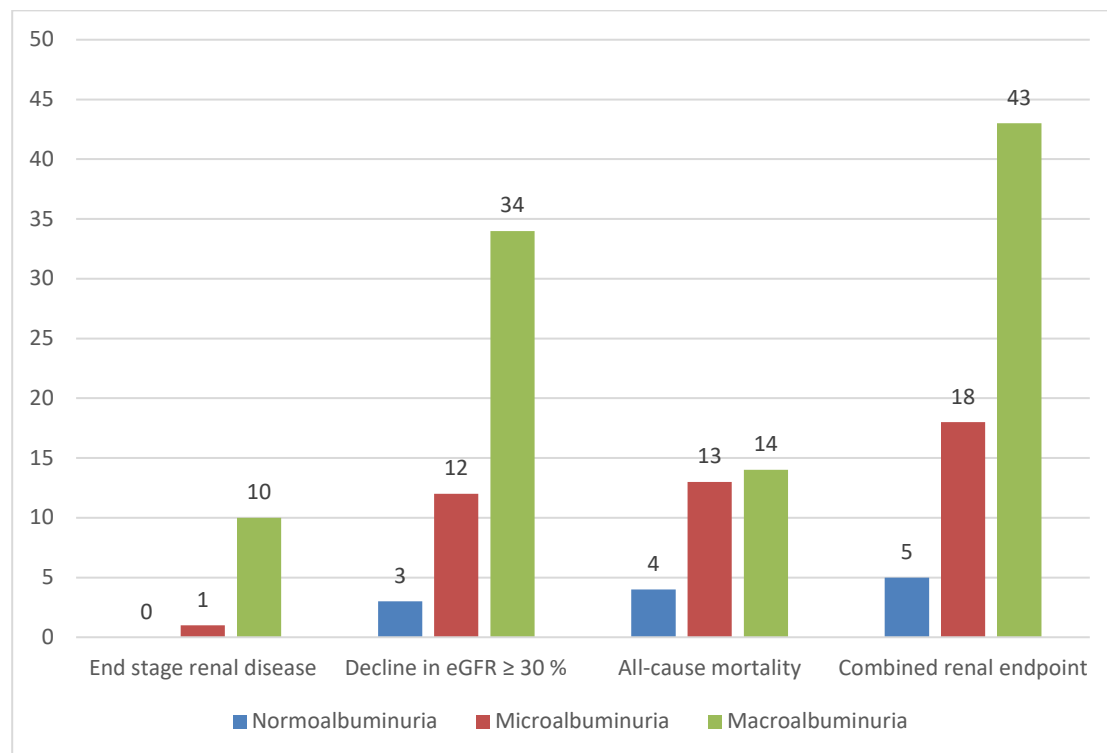

Numbers indicate percentage of individuals in each group reaching the endpoint.
